# Supplementary material for: PPARγ Controls Ectopic Adipogenesis and Cross-Talks with Myogenesis During Skeletal Muscle Regeneration
Source: PubMed Central journal article supplement (PMC6073847; doi:10.3390/ijms19072044), 2018-07-13

A

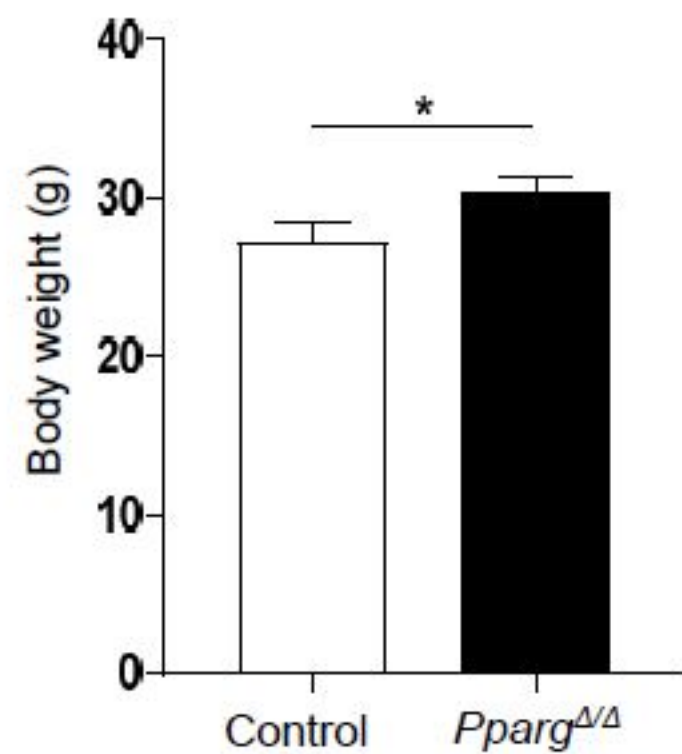

B

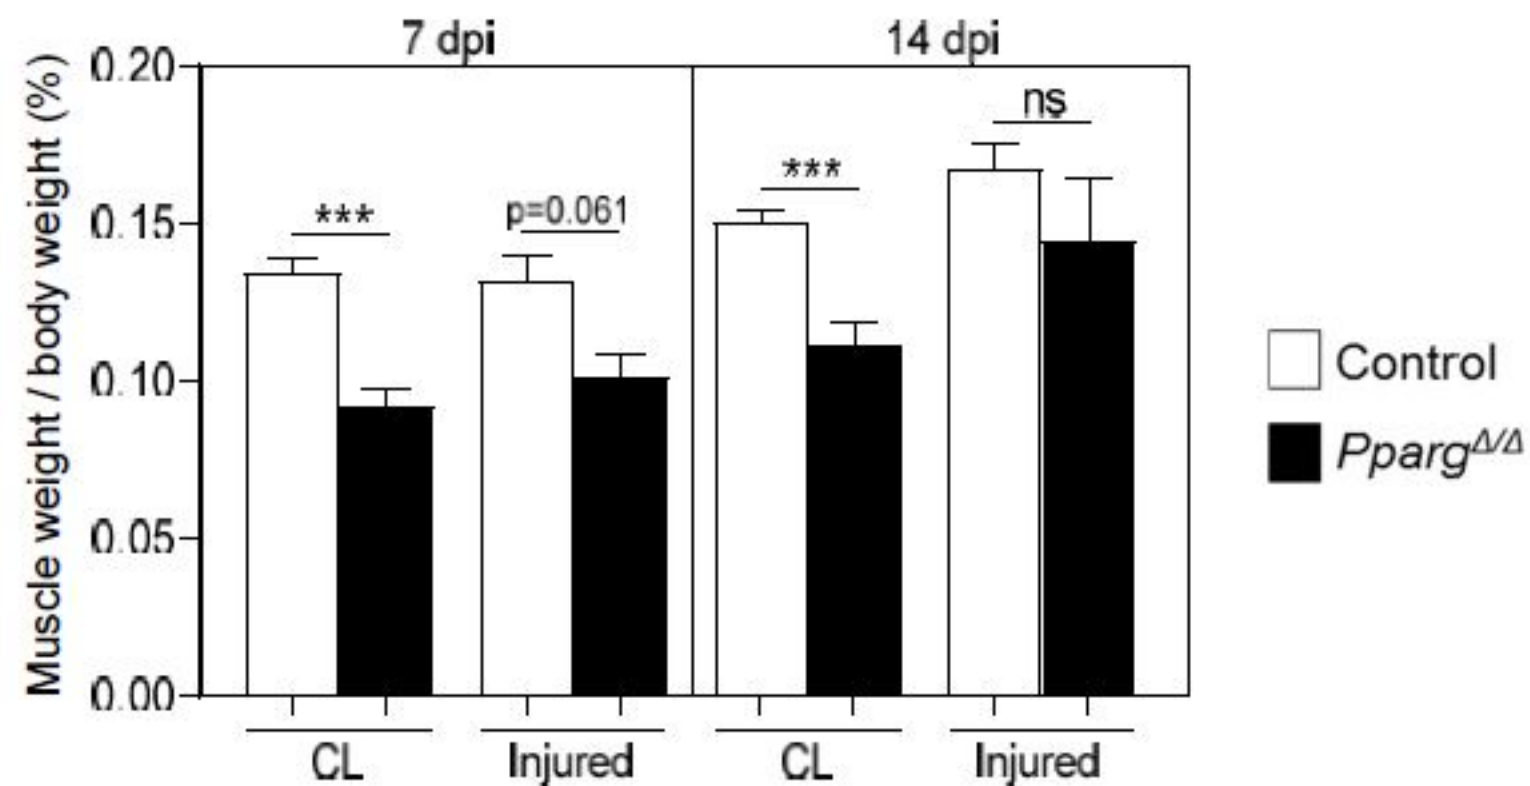

Supplement: ijms-19-02044-s001.pdf [file ijms-19-02044-s001.pdf]
